# Supplementary material for: Genome-wide association analysis for heat tolerance at flowering detected a large set of genes involved in adaptation to thermal and other stresses
Source: PLoS One. 2017 Feb 2;12(2):e0171254. doi: 10.1371/journal.pone.0171254 (PMC5289576; doi:10.1371/journal.pone.0171254)
Supplement: S3 Table — (XLSX) [file pone.0171254.s008.xlsx]

## Sheet: Feuil1
Supplementary table ST3: Variability of decrease of pairwise linkage disequilibrium with distance between markers among the 12 chromosomes
Chr	"1-25"	25-50	50-75	75-100	100-125	125-150	150-175	175-200	200-225	250-250	250-300	300-350	350-400	400-450	450-500	500-600	600-700	700-800	800-900	900-1000	1000-1500	1500-2000	2000-2500	2500-3000	3000-3500	3500-4000	4000-4500	4500-5000	>5000
1	0.401	0.297	0.246	0.233	0.199	0.189	0.182	0.191	0.173	0.159	0.15	0.157	0.131	0.13	0.119	0.112	0.109	0.105	0.098	0.105	0.085	0.089	0.085	0.083	0.052	0.069	0.056	0.028	0.015
2	0.439	0.367	0.305	0.272	0.246	0.234	0.22	0.177	0.177	0.165	0.149	0.138	0.143	0.129	0.112	0.114	0.098	0.089	0.087	0.082	0.061	0.058	0.078	0.045	0.05			0.05	0.055
3	0.516	0.428	0.386	0.314	0.305	0.264	0.257	0.252	0.254	0.246	0.218	0.185	0.16	0.155	0.152	0.139	0.119	0.117	0.117	0.095	0.087	0.068	0.072	0.056	0.066	0.05	0.055	0.053	0.031
4	0.496	0.368	0.331	0.303	0.267	0.221	0.213	0.183	0.182	0.193	0.165	0.136	0.135	0.124	0.123	0.107	0.095	0.095	0.082	0.076	0.071	0.071	0.076	0.096	0.132	0.336	0.309	0.279	0.308
5	0.637	0.487	0.467	0.425	0.352	0.356	0.317	0.268	0.238	0.253	0.197	0.187	0.187	0.184	0.137	0.136	0.139	0.119	0.125	0.103	0.083	0.083	0.077	0.076	0.121	0.211	0.171	0.143	0.113
6	0.521	0.398	0.382	0.345	0.322	0.268	0.257	0.223	0.216	0.191	0.19	0.155	0.137	0.126	0.108	0.102	0.094	0.081	0.073	0.068	0.066	0.06	0.106	0.105	0.125	0.063	0.057	0.036
7	0.589868	0.428938	0.380722	0.346149	0.284347	0.299065	0.248926	0.216224	0.227423	0.228086	0.198096	0.175688	0.157992	0.13268	0.133802	0.138953	0.13001	0.10389	0.11659	0.110833	0.0707458	0.0423124	0.0397412	0.028223	0.0444009	0.0362765	0.0930927	0.0715992	0.0630107
8	0.404629	0.283842	0.281838	0.22841	0.243639	0.204547	0.177554	0.172956	0.171105	0.13624	0.136077	0.136055	0.120176	0.104403	0.101887	0.0965406	0.0869612	0.0824892	0.0803118	0.0794229	0.0755492	0.0872497	0.0753984	0.0701478	0.0878212	0.0936104	0.123913	0.109648	0.0639119
9	0.467248	0.367287	0.311732	0.280268	0.282959	0.239649	0.215136	0.208016	0.220605	0.215169	0.161521	0.144082	0.117277	0.114317	0.11528	0.0930257	0.087011	0.0789107	0.08019	0.0693962	0.0667061	0.0713221	0.0709008	0.0589204	0.0544985	0.1526	0.252723	0.182777
10	0.638482	0.448972	0.374141	0.309167	0.284426	0.248143	0.19352	0.214163	0.254936	0.219312	0.178812	0.167231	0.152175	0.153119	0.142695	0.111894	0.110184	0.103666	0.0985616	0.0802752	0.0686279	0.0620624	0.0685398	0.0830254	0.100902	0.10378	0.149323
11	0.465583	0.324746	0.275421	0.250934	0.22104	0.18289	0.187636	0.154467	0.149335	0.139719	0.123217	0.118765	0.112914	0.0981754	0.0955845	0.0830882	0.0701336	0.0677075	0.074031	0.0630584	0.0628792	0.0626001	0.0995832	0.210904	0.227819	0.167943	0.165091	0.162666	0.0933313
12	0.485035	0.394651	0.358467	0.288678	0.266563	0.254614	0.22723	0.216887	0.182275	0.178926	0.155145	0.150423	0.15671	0.13069	0.121457	0.117731	0.116021	0.115099	0.10856	0.1092	0.0984965	0.0851344	0.0682594	0.0801994	0.125358
Average	0.505071	0.382786	0.34161	0.299634	0.272831	0.246742	0.224667	0.206393	0.203807	0.193704	0.168489	0.154187	0.14252	0.131782	0.121809	0.112603	0.104527	0.0964802	0.0950203	0.0867655	0.0746671	0.0699734	0.0763686	0.0827017	0.0989	0.128321	0.143214	0.111569	0.0927817
Stdev	0.0806371	0.0610615	0.0615239	0.0550952	0.0424997	0.0481999	0.0402736	0.0328681	0.035592	0.0393361	0.0282371	0.021234	0.0214284	0.0233784	0.0169112	0.0181506	0.0197112	0.0167442	0.0182095	0.0170478	0.0113876	0.0141154	0.0165507	0.0457133	0.0525072	0.09209	0.0859398	0.0804289	0.0923829
	25	50	75	100	125	150	175	200	225	250	300	350	400	450	500	600	700	800	900	1000	1500	2000	2500	3000	3500	4000	4500	5000	6000
