# Supplementary material for: Genome-wide association analysis for heat tolerance at flowering detected a large set of genes involved in adaptation to thermal and other stresses
Source: PLoS One. 2017 Feb 2;12(2):e0171254. doi: 10.1371/journal.pone.0171254 (PMC5289576; doi:10.1371/journal.pone.0171254)
Supplement: S4 Table — (XLSX) [file pone.0171254.s009.xlsx]

## Sheet: Feuil1
			Plant Architecture											Cycle		Biomasse				Senscence
Supplementary table ST4: Results single marker based association analysis (Sm-GWAS) for 20 phenotypic traits, and colocalisation of significant loci with candidate gens.
Marker	Chr	Site	PTHT	PNEX	PNLT	PNDM	PNPOS	FLFAG	LFAG	TINB	PNNB	LFAR	SLA	DTHD	HDLT	SHDW	LFDW	ST+PNDW	DLFDW	LFSNS16	LFSNS21	SPKST			Major allele	Minor allele	MAF	MarkerR2	Gene ID	Function	Location
S01_05721734	1	5721734																			8.1778e-06				G	A	0.0778443	0.04765	LOC_Os01g10690	POLD3 - Putative DNA polymerase delta complex subunit, expressed	NON_SYNONYMOUS_CODING
D01_05763894	1	5763894				3.0566e-05																			A	T	0.0359281	0.11	LOC_Os01g10790	WD domain, G-beta repeat domain containing protein, expressed	INTRON
D01_05768517	1	5768517				3.0566e-05																			A	T	0.0359281	0.126	LOC_Os01g10810	rho termination factor, N-terminal domain containing protein, expressed	INTRON
S01_05815041	1	5815041																			2.6282e-05				G	A	0.0838323	0.05031	LOC_Os01g10900	MRH1, putative, expressed	UTR_3_PRIME: 46 bases from CDS
D01_14332199	1	14332199																		8.195e-05					A	T	0.113772	0.0177	LOC_Os01g25370	SUMO protease, putative, expressed	INTRON
D01_27161527	1	27161527							4.4768e-05																A	T	0.11976	0.09502	LOC_Os01g47520	hypothetical protein	INTRON
D01_27196502	1	27196502							8.6908e-06																A	T	0.101796	0.11252	LOC_Os01g47560	WRKY16, expressed	UTR_3_PRIME: 312 bases from CDS
D01_27251511	1	27251511							3.516e-08																A	T	0.0718563	0.16992	0	Not found	INTERGENIC
D01_27262971	1	27262971							8.5945e-05																A	T	0.0778443	0.08886	LOC_Os01g47650	vacuolar protein sorting-associated protein 16, putative, expressed	INTRON
S01_27718131	1	27718131							1.8766e-05																G	T	0.0538922	0.10222	LOC_Os01g48370	OsFBT1 - F-box and tubby domain containing protein, expressed	INTRON
D01_27941462	1	27941462							3.6361e-06																A	T	0.0778443	0.11668	LOC_Os01g48720	RNA polymerase III subunit RPC82 family protein, putative, expressed	SYNONYMOUS_CODING
S01_30476158	1	30476158																				5.6824e-05			C	A	0.365269	0.06327	0	Not found	INTERGENIC
S01_33007138	1	33007138																				7.368e-05			C	G	0.437126	0.09155	LOC_Os01g57110	SNF2 family N-terminal domain containing protein, expressed	INTRON
S01_34906121	1	34906121																				6.4657e-06			A	G	0.0359281	0.11678	LOC_Os01g60340	NTMC2Type1.1 protein, putative, expressed	INTRON
D01_35001790	1	35001790																				6.4657e-06			A	T	0.0359281	0.11678	LOC_Os01g60520	WRKY116, expressed	INTRON
S01_35080336	1	35080336																				1.7304e-07			A	G	0.0299401	0.15324	0	Not found	INTERGENIC
S01_38434998	1	38434998	8.7094e-05																						A	G	0.491018	0.08295	0	Not found	INTERGENIC
S01_38999211	1	38999211	1.727e-07																						G	T	0.353293	0.13823	LOC_Os01g67200	ribosomal protein L13 family protein, putative, expressed	INTRON
S01_39032128	1	39032128	1.727e-07																						C	T	0.353293	0.13823	LOC_Os01g67250	Rad21 / Rec8 like protein, putative, expressed	INTRON
S01_39264931	1	39264931	6.8418e-05																						C	T	0.185629	0.08474	LOC_Os01g67550	FAD binding domain containing protein, expressed	NON_SYNONYMOUS_CODING
D01_39563606	1	39563606	1.7695e-05																						A	T	0.431138	0.09808	LOC_Os01g68050	transmembrane amino acid transporter protein, putative, expressed	INTRON
S02_00891822	2	891822																				3.8548e-06			T	C	0.0479042	0.12099	LOC_Os02g02500	remorin family protein, putative, expressed	INTRON
S02_06086495	2	6086495																			9.1245e-05				T	G	0.353293	0.05521	LOC_Os02g11780	transcription factor S-II, central domain containing protein, expressed	INTRON
S02_08342506	2	8342506							7.6389e-05																T	C	0.0778443	0.09027	LOC_Os02g14929	T-complex protein, putative, expressed	SYNONYMOUS_CODING
D02_08442473	2	8442473							5.4859e-05																A	T	0.0718563	0.09365	0	Not found	INTERGENIC
D02_08449912	2	8449912							2.6156e-06																A	T	0.0778443	0.12511	0	Not found	INTERGENIC
D02_08454752	2	8454752							5.4859e-05																A	T	0.0718563	0.09365	LOC_Os02g15160	OsFBX40 - F-box domain containing protein, expressed	SYNONYMOUS_CODING
D02_26538647	2	26538647																	2.2163e-05						A	T	0.0598802	0.09811	0	Not found	INTERGENIC
D02_34882131	2	34882131																			9.1207e-05				A	T	0.491018	0.05149	0	Not found	INTERGENIC
D02_34889065	2	34889065																			9.1617e-05				A	T	0.431138	0.09739	0	Not found	INTERGENIC
S02_35070672	2	35070672													8.1944e-05										G	A	0.239521	0.08914	LOC_Os02g57240	oxidoreductase, aldo/keto reductase family protein, putative, expressed	NON_SYNONYMOUS_CODING
S03_00137167	3	137167																			0.00016836				G	A	0.155689	0.02925	LOC_Os03g01210	uncharacterized Cys-rich domain containing protein, putative, expressed	NON_SYNONYMOUS_CODING
S03_01177466	3	1177466												9.1045e-05											C	T	0.347305	0.08356	0	Not found	INTERGENIC
D03_04855554	3	4855554															2.6617e-05								A	T	0.0479042	0.00548	LOC_Os03g09290	yippee zinc-binding protein, putative, expressed	INTRON
D03_04863074	3	4863074															9.3604e-05								A	T	0.0479042	0.00029755	LOC_Os03g09310	frigida, putative, expressed	INTRON
D03_04874013	3	4874013															7.8905e-05								A	T	0.0419162	0.00382	0	Not found	INTERGENIC
D03_04877899	3	4877899																8.252e-05	8.8199e-05						A	T	0.0538922	0.08449	LOC_Os03g09810	polyamine oxidase precursor, putative, expressed	SYNONYMOUS_CODING
D03_04948501	3	4948501															7.8905e-05								A	T	0.0419162	0.00382	LOC_Os03g09930	sulfate transporter, putative, expressed	INTRON
S03_04952967	3	4952967															7.8905e-05								T	A	0.0419162	0.00382	LOC_Os03g09930	sulfate transporter, putative, expressed	INTRON
D03_04954251	3	4954251															7.8905e-05								A	T	0.0419162	0.00382	LOC_Os03g09940	sulfate transporter, putative, expressed	UTR_3_PRIME: 176 bases from CDS
D03_04974765	3	4974765															7.8905e-05								A	T	0.0419162	0.00382	0	Not found	INTERGENIC
S03_09308870	3	9308870											5.624e-06												T	C	0.371257	0.11073	LOC_Os03g16790	DHHC zinc finger domain containing protein, expressed	NON_SYNONYMOUS_CODING
D03_09324606	3	9324606											2.1207e-05												A	T	0.341317	0.09849	0	Not found	INTERGENIC
S03_09363021	3	9363021											5.9122e-05												T	C	0.353293	0.08927	0	Not found	INTERGENIC
S03_09896090	3	9896090											0.0001												G	T	0.323353	0.0809	LOC_Os03g17780	WD domain, G-beta repeat domain containing protein, expressed	NON_SYNONYMOUS_CODING
D03_10147632	3	10147632							5.0764e-07																A	T	0.0538922	0.14229	0	Not found	INTERGENIC
S03_10197954	3	10197954							2.1231e-06																A	T	0.0778443	0.12556	LOC_Os03g18190	importin subunit beta, putative, expressed	SYNONYMOUS_CODING
S03_12537441	3	12537441																				3.1802e-09			C	T	0.0359281	0.18937	LOC_Os03g21914	ATP binding protein, putative, expressed	INTRON
D03_34343158	3	34343158										9.453e-05					4.2453e-05								A	T	0.0598802	0.08039	LOC_Os03g60390	PHD finger protein, putative, expressed	UTR_3_PRIME: 339 bases from CDS
S03_34728854	3	34728854				2.3427e-05																			A	T	0.0359281	0.10581	LOC_Os03g61140	expressed protein	INTRON
D04_02533498	4	2533498												1.4162e-05											A	T	0.215569	0.1034	LOC_Os04g05104	retrotransposon protein, putative, unclassified, expressed	NON_SYNONYMOUS_CODING
S04_06069831	4	6069831																				8.6805e-05			C	A	0.161677	0.08975	LOC_Os04g11165	gamma-thionin family domain containing protein, expressed	NON_SYNONYMOUS_CODING
D04_16718536	4	16718536							9.3188e-05																A	T	0.0299401	0.08694	0	Not found	INTERGENIC
D04_17876533	4	17876533																				6.5792e-05			A	T	0.107784	0.09213	LOC_Os04g29960	OsWAK43 - OsWAK receptor-like protein kinase, expressed	NON_SYNONYMOUS_CODING
S04_21450464	4	21450464														7.0136e-05		2.1686e-05							C	T	0.0419162	0.07667	0	Not found	INTERGENIC
D04_25760519	4	25760519																			9.15e-06				A	T	0.0658683	0.03625	0	Not found	INTERGENIC
D04_25760519	4	25760519																		9.15e-06					A	T	0.0658683	0.04544	0	Not found	INTERGENIC
S04_30227164	4	30227164																			9.12035e-05				T	A	0.173653	0.03743	LOC_Os04g51060	expressed protein	NON_SYNONYMOUS_CODING
S04_30483968	4	30483968							7.0126e-05																C	T	0.0538922	0.09126	0	Not found	INTERGENIC
D04_30571650	4	30571650							6.1305e-05																A	T	0.0598802	0.0927	LOC_Os04g51600	expressed protein	SYNONYMOUS_CODING
S04_30573319	4	30573319							6.2056e-07																A	G	0.0479042	0.14087	LOC_Os04g51610	calcium-transporting ATPase, plasma membrane-type, putative, expressed	INTRON
D04_30575948	4	30575948							6.2056e-07																A	T	0.0479042	0.14087	LOC_Os04g51610	calcium-transporting ATPase, plasma membrane-type, putative, expressed	SYNONYMOUS_CODING
S04_30580954	4	30580954							6.2056e-07																A	G	0.0479042	0.14087	LOC_Os04g51610	calcium-transporting ATPase, plasma membrane-type, putative, expressed	INTRON
D04_30585343	4	30585343							6.2056e-07																A	T	0.0479042	0.14087	0	Not found	INTERGENIC
D04_30598452	4	30598452							6.2056e-07																A	T	0.0479042	0.14087	0	Not found	INTERGENIC
D04_30607537	4	30607537							6.2056e-07																A	T	0.0479042	0.14087	0	Not found	INTERGENIC
D04_30610597	4	30610597							6.2056e-07																A	T	0.0479042	0.14087	0	Not found	INTERGENIC
D04_30862166	4	30862166																		8.67e-05					A	T	0.0598802	0.04179	LOC_Os04g51980	transferase family domain containing protein, expressed	INTRON
D04_31616428	4	31616428												4.9852e-05											A	T	0.467066	0.0906	0	Not found	INTERGENIC
S04_31751802	4	31751802												3.9134e-06											A	G	0.48503	0.11583	LOC_Os04g53310	soluble starch synthase 3, chloroplast precursor, putative, expressed	UTR_3_PRIME: 342 bases from CDS
S04_31764040	4	31764040												2.4169e-05											A	T	0.299401	0.09802	0	Not found	INTERGENIC
S05_00147944	5	147944								1.3861e-06	2.522e-05														C	T	0.383234	0.11906	0	Not found	INTERGENIC
D05_00165296	5	165296								7.8492e-05															A	T	0.419162	0.08371	LOC_Os05g01240	AML1, putative, expressed	INTRON
S05_00596102	5	596102						5.0328e-06																	C	T	0.0299401	0.11721	LOC_Os05g02040	RPA1C - Putative single-stranded DNA binding complex subunit 1, expressed	NON_SYNONYMOUS_CODING
S05_00692983	5	692983																			9.11731e-05				C	G	0.167665	0.02968	0	Not found	INTERGENIC
D05_03664582	5	3664582							9.1585e-10																A	T	0.0479042	0.19902	0	Not found	INTERGENIC
D05_03674037	5	3674037							9.1585e-10																A	T	0.0479042	0.19902	LOC_Os05g07000	splicing factor, arginine/serine-rich 7, putative, expressed	UTR_3_PRIME: 369 bases from CDS
S05_03765056	5	3765056							9.1585e-10																G	A	0.0479042	0.19902	LOC_Os05g07130	6PF-2-K/Fru-2,6-P2ASE liver isozyme, putative, expressed	INTRON
D05_03977568	5	3977568							1.5937e-05																A	T	0.0598802	0.10281	0	Not found	INTERGENIC
S05_04131283	5	4131283							7.0663e-06																G	T	0.0658683	0.11216	LOC_Os05g07680	KIP1, putative, expressed	NON_SYNONYMOUS_CODING
D05_04146770	5	4146770							7.0663e-06																A	T	0.0658683	0.11216	LOC_Os05g07710	WD40-like domain containing protein, putative, expressed	SYNONYMOUS_CODING
D05_04188405	5	4188405							2.1803e-06																A	T	0.0479042	0.1222	0	Not found	INTERGENIC
S05_04198477	5	4198477							2.1803e-06																T	G	0.0479042	0.1222	LOC_Os05g07790	DNA binding protein, putative, expressed	INTRON
D05_04254037	5	4254037							2.1803e-06																A	T	0.0479042	0.1222	LOC_Os05g07870	triose phosphate/phosphate translocator, non-green plastid,chloroplast precursor, putative, expressed	SYNONYMOUS_CODING
D05_04266382	5	4266382							2.1803e-06																A	T	0.0479042	0.1222	0	Not found	INTERGENIC
D05_04417332	5	4417332							2.8956e-08																A	T	0.0419162	0.16521	0	Not found	INTERGENIC
S05_04484555	5	4484555							2.6747e-06																T	C	0.0419162	0.12024	0	Not found	INTERGENIC
D05_04554886	5	4554886							9.9505e-06																A	T	0.0538922	0.10682	LOC_Os05g08350	OsFBX162 - F-box domain containing protein, expressed	INTRON
D05_04620602	5	4620602							2.1803e-06																A	T	0.0479042	0.1222	0	Not found	INTERGENIC
S05_08970765	5	8970765							4.8198e-05																T	A	0.0718563	0.09237	LOC_Os05g15890	SNF2 family N-terminal domain containing protein, expressed	SYNONYMOUS_CODING
S05_22627608	5	22627608																				7.1834e-05			C	T	0.0419162	0.09215	LOC_Os05g38570	riboflavin biosynthesis protein ribAB, chloroplast precursor, putative, expressed	NON_SYNONYMOUS_CODING
S05_22836374	5	22836374																				9.4747e-05			G	A	0.0239521	0.08794	LOC_Os05g38950	TBC domain containing protein, expressed	SYNONYMOUS_CODING
S05_22872767	5	22872767																				9.4747e-05			G	A	0.0239521	0.08794	LOC_Os05g38984	expressed protein	UTR_5_PRIME: 22 bases from TSS
D05_23074249	5	23074249																				9.4747e-05			A	T	0.0239521	0.08794	LOC_Os05g39330	retrotransposon protein, putative, unclassified, expressed	SYNONYMOUS_CODING
S05_23213365	5	23213365																				9.4747e-05			A	G	0.0239521	0.08794	0	Not found	INTERGENIC
S05_27663495	5	27663495										9.1084e-05													C	G	0.329341	0.08095	LOC_Os05g48260	wax synthase, putative, expressed	SYNONYMOUS_CODING
D06_02382723	6	2382723											8.7155e-05												A	T	0.0359281	0.08825	LOC_Os06g05284	transferase family protein, putative, expressed	UTR_3_PRIME: 514 bases from CDS
D06_02859743	6	2859743											4.0995e-05												A	T	0.125749	0.09531	LOC_Os06g06170	expressed protein	UTR_3_PRIME: 128 bases from CDS
S06_03081327	6	3081327																				3.9679e-05			C	A	0.0479042	0.09594	LOC_Os06g06560	starch synthase, putative, expressed	INTRON
S06_03191839	6	3191839											9.411e-05												C	G	0.347305	0.0859	0	Not found	INTERGENIC
D06_03359591	6	3359591																				1.2412e-05			A	T	0.0598802	0.10714	0	Not found	INTERGENIC
S06_03437953	6	3437953																				4.5197e-07			G	A	0.0479042	0.14097	LOC_Os06g07180	expressed protein	INTRON
D06_04296547	6	4296547																	5.2217e-05						A	T	0.0658683	0.08945	0	Not found	INTERGENIC
D06_23809916	6	23809916																		8.31e-05					A	T	0.473054	0.04781	LOC_Os06g40020	DEAD-box ATP-dependent RNA helicase 52A, putative, expressed	INTRON
S06_25501329	6	25501329																	6.8197e-05						T	C	0.101796	0.08732	LOC_Os06g42430	expressed protein	SYNONYMOUS_CODING
D06_28956397	6	28956397												3.6033e-06											A	T	0.0778443	0.1173	LOC_Os06g47840	ZOS6-08 - C2H2 zinc finger protein, expressed	INTRON
D07_02620316	7	2620316						4.4791e-05																	A	T	0.0598802	0.09464	0	Not found	INTERGENIC
S07_03538451	7	3538451																			9.1406e-05				G	A	0.185629	0.02055	0	Not found	INTERGENIC
D07_05277899	7	5277899							6.7392e-07																A	T	0.0299401	0.13859	LOC_Os07g09914	expressed protein	UTR_3_PRIME: 489 bases from CDS
D07_05387715	7	5387715							6.7392e-07																A	T	0.0299401	0.13859	0	Not found	INTERGENIC
D07_05388753	7	5388753							3.8364e-05																A	T	0.0359281	0.09761	0	Not found	INTERGENIC
S07_05424303	7	5424303							3.8364e-05																A	T	0.0359281	0.09761	LOC_Os07g10110	expressed protein	NON_SYNONYMOUS_CODING
D07_05457657	7	5457657							6.7392e-07																A	T	0.0299401	0.13859	LOC_Os07g10150	coatomer subunit gamma-2, putative, expressed	INTRON
S07_05611869	7	5611869							5.4841e-05																A	G	0.0359281	0.09214	0	Not found	INTERGENIC
D07_05643230	7	5643230							6.2625e-05																A	T	0.0419162	0.09102	0	Not found	INTERGENIC
S07_08833570	7	8833570				2.0709e-06																			C	A	0.0299401	0.13133	LOC_Os07g15330	expressed protein	INTRON
S07_08833570	7	8833570																			5.69e-05				C	A	0.0299401	0.03684	LOC_Os07g15330	expressed protein	INTRON
S07_08833570	7	8833570																		5.69e-05					C	A	0.0299401	0.05711	LOC_Os07g15330	expressed protein	INTRON
S07_15887872	7	15887872																			9.23e-05				T	A	0.413174	0.0107	LOC_Os07g27320	glycosyl hydrolase family 10 protein, putative, expressed	NON_SYNONYMOUS_CODING
S07_15887872	7	15887872																		9.33e-05					T	A	0.413174	0.04619	LOC_Os07g27320	glycosyl hydrolase family 10 protein, putative, expressed	NON_SYNONYMOUS_CODING
S07_19095685	7	19095685				2.8934e-06																			G	A	0.191617	0.12804	LOC_Os07g32150	retrotransposon protein, putative, Ty1-copia subclass, expressed	INTRON
S07_19590129	7	19590129																	4.5157e-05						G	C	0.0239521	0.091	0	Not found	INTERGENIC
S07_19592109	7	19592109															1.6815e-07								T	A	0.0419162	0.00562	0	Not found	INTERGENIC
S07_19592109	7	19592109											9.8137e-05												T	A	0.0419162	0.08609	0	Not found	INTERGENIC
D07_19948291	7	19948291											2.2873e-05												A	T	0.0239521	0.10183	LOC_Os07g33370	IQ calmodulin-binding motif family protein, expressed	INTRON
S07_22976125	7	22976125							1.1057e-05																A	G	0.0479042	0.1089	LOC_Os07g38280	insulin-degrading enzyme, putative, expressed	INTRON
D07_23077968	7	23077968							2.6167e-05																A	T	0.0538922	0.10045	LOC_Os07g38390	chalcone isomerase, putative, expressed	INTRON
S07_23495097	7	23495097							1.1057e-05																C	T	0.0479042	0.1089	0	Not found	INTERGENIC
S07_23523728	7	23523728							6.8657e-06																A	G	0.0598802	0.11412	LOC_Os07g39290	ruvB-like, putative, expressed	INTRON
S07_29322083	7	29322083																				8.5683e-05			T	C	0.197605	0.07547	0	Not found	INTERGENIC
S08_04709789	8	4709789						5.3021e-05																	G	C	0.0419162	0.09372	LOC_Os08g08230	kinesin-like protein, identical, putative, expressed	NON_SYNONYMOUS_CODING
D08_18993843	8	18993843							1.2975e-05																A	T	0.113772	0.10882	LOC_Os08g30770	ABC transporter, ATP-binding protein, putative, expressed	SYNONYMOUS_CODING
S08_19029370	8	19029370							4.8998e-05																G	T	0.0718563	0.0957	LOC_Os08g30810	puromycin-sensitive aminopeptidase, putative, expressed	INTRON
S08_20039326	8	20039326				1.9806e-05																			C	T	0.0359281	0.10762	LOC_Os08g32360	expressed protein	INTRON
D08_26037764	8	26037764														8.5006e-05	3.129e-05								A	T	0.0479042	0.07299	0	Not found	INTERGENIC
D08_26047920	8	26047920														2.6025e-05	2.1299e-05	4.4526e-05							A	T	0.0419162	0.08412	LOC_Os08g41250	signal recognition particle receptor subunit beta, putative, expressed	INTRON
S08_27154960	8	27154960													2.7121e-05										C	A	0.0479042	0.09918	0	Not found	INTERGENIC
D09_20936773	9	20936773																			9.411e-05				A	T	0.39521	0.03283	LOC_Os09g36270	pantothenate kinase, putative, expressed	SYNONYMOUS_CODING
S09_20951734	9	20951734																			8.4206e-05				A	T	0.401198	0.03559	LOC_Os09g36300	OsLonP4 - Putative Lon protease homologue, expressed	INTRON
S10_00925315	10	925315				5.5269e-05																			A	C	0.101796	0.09671	LOC_Os10g02490	oxidoreductase, aldo/keto reductase family protein, putative, expressed	INTRON
D10_1006357	10	1006357				1.0529e-05																			A	T	0.137725	0.11429	0	Not found	INTERGENIC
D10_15924661	10	15924661							8.7322e-05																A	T	0.0718563	0.0879	0	Not found	INTERGENIC
S10_17237925	10	17237925																			9.188e-05				A	T	0.185629	0.02198	0	Not found	INTERGENIC
S10_17237925	10	17237925																		8.88e-05					A	T	0.185629	0.03068	0	Not found	INTERGENIC
D10_17381269	10	17381269																			9.18143e-05				A	T	0.167665	0.02603	0	Not found	INTERGENIC
S10_20930075	10	20930075																				5.5972e-05			G	A	0.131737	0.09324	LOC_Os10g39200	expressed protein	NON_SYNONYMOUS_CODING
D10_21182537	10	21182537																				8.249e-06			A	T	0.167665	0.08336	0	Not found	INTERGENIC
D11_442456	11	442456																				4.8901e-05			A	T	0.269461	0.07583	LOC_Os11g01830	staphylococcal nuclease homologue, putative, expressed	INTRON
D11_6528473	11	6528473																		1.58e-05					A	T	0.479042	0.05402	0	Not found	INTERGENIC
S11_19036381	11	19036381											2.2697e-05												C	G	0.0958084	0.09997	LOC_Os11g32220	hypothetical protein	INTRON
D11_19474124	11	19474124											2.877e-05												A	T	0.11976	0.09749	0	Not found	INTERGENIC
S11_20139623	11	20139623																				8.0361e-05			G	A	0.0598802	0.09025	LOC_Os11g34360	lung seven transmembrane domain containing protein, putative, expressed	INTRON
D11_21324876	11	21324876				3.7247e-07																			A	T	0.0239521	0.14905	LOC_Os11g36230	expressed protein	SYNONYMOUS_CODING
D11_21860824	11	21860824											9e-05												A	T	0.0958084	0.0819	LOC_Os11g37040	expressed protein	SYNONYMOUS_CODING
D11_21862228	11	21862228											4.4107e-05												A	T	0.101796	0.09495	0	0.01637	0.20034
S11_24949694	11	24949694										4.9896e-05													G	C	0.0359281	0.08666	0	Not found	INTERGENIC
S11_24951820	11	24951820										4.9896e-05													T	A	0.0359281	0.08666	LOC_Os11g41600	expressed protein	INTRON
D12_2919006	12	2919006													7.9506e-05										A	T	0.383234	0.08926	0	Not found	INTERGENIC
S12_02928726	12	2928726													6.0305e-06										G	T	0.347305	0.11413	LOC_Os12g06180	HVA22, putative, expressed	INTRON
S12_03298469	12	3298469							4.7683e-06																G	A	0.0778443	0.12061	LOC_Os12g06800	serine esterase family protein, putative, expressed	SYNONYMOUS_CODING
D12_3337493	12	3337493							4.7683e-06																A	T	0.0778443	0.12061	0	Not found	INTERGENIC
D12_3418976	12	3418976							2.5411e-05																A	T	0.0538922	0.10256	0	Not found	INTERGENIC
S12_04507836	12	4507836				3.2448e-05																			T	A	0.0658683	0.1024	LOC_Os12g08770	photosystem I reaction center subunit N, chloroplast precursor, putative, expressed	UTR_3_PRIME: 278 bases from CDS
S12_04551746	12	4551746				7.746e-05																			A	T	0.0359281	0.09304	LOC_Os12g08820	growth regulator related protein, putative, expressed	NON_SYNONYMOUS_CODING
D12_5102507	12	5102507				3.1517e-05																			A	T	0.125749	0.10285	0	Not found	INTERGENIC
S12_05131658	12	5131658				3.1517e-05																			A	G	0.125749	0.10285	0	Not found	INTERGENIC
D12_6136693	12	6136693																			9.405e-05				A	T	0.251497	0.03098	0	Not found	INTERGENIC
S12_10755336	12	10755336		2.0528e-05																					C	T	0.233533	0.10554	0	Not found	INTERGENIC
D12_10809322	12	10809322		2.0528e-05																					A	T	0.233533	0.10554	0	Not found	INTERGENIC
D12_10819809	12	10819809		1.0674e-05																					A	T	0.227545	0.11228	0	Not found	INTERGENIC
S12_10870667	12	10870667		2.0528e-05																					G	A	0.233533	0.10554	LOC_Os12g18770	oxysterol-binding protein, putative, expressed	INTRON
D12_24182554	12	24182554																				2.4332e-05			A	T	0.0299401	0.10354	0	Not found	INTERGENIC
D12_25624918	12	25624918																				3.1023e-08			A	T	0.0299401	0.24852	LOC_Os12g41350	meiotic asynaptic mutant 1, putative, expressed	INTRON
D12_25666758	12	25666758																				1.7359e-05			A	T	0.0479042	0.10683	0	Not found	INTERGENIC
D12_25672735	12	25672735																				2.9868e-09			A	T	0.0359281	0.19347	0	Not found	INTERGENIC
D12_25675740	12	25675740																				2.9868e-09			A	T	0.0359281	0.19347	0	Not found	INTERGENIC
SNP with P-value < 1e-05			5	4	0	13	0	3	54	2	1	4	13	6	4	3	11	3	5	8	17	27		183
SNP with 1e-07>P-value <1e-06			0	0		2		1	6	1	0	0	1	1	1	0	0	0	0	1	2	3		19
SNP with 1e-08>P-value <1e-07			2	0		1		0	3	0	0	0	0	0	0	0	1	0	0	0	0	2		9
SNP with 1e-09>P-value <1e-08			0	0		0		0	2	0	0	0	0	0	0	0	0	0	0	0	0	1		3
SNP with P-value < 1e-09			0	0		0		0	1	0	0	0	0	0	0	0	0	0	0	0	0	1		2
Nombre Independant loci			2	1		9		3	14	1	1	3	5	4	3	2	4	4	4	8	13	15		96
Mean MAF of significant SNPs			0.360479	0.232036		0.0754491		0.0437126	0.057485	0.41	0.383234	0.115269	0.18	0.268862	0.254491	0.0437126	0.0419162	0.0419162	0.0610778	0.24	0.26	0.09		0.175536
